# Supplementary material
Source: PubMed Central journal article supplement (PMC2725224)

## Supplemental Legends

**Supplemental Fig. 1. Expression of the mouse DSPP by RT-PCR. A and B.** PCR amplification of the mouse DSPP cDNA from several tissues. Poly (A) RNA from 6 month-old male (**A**) and female (**B**) mice was reversely transcribed. cDNA samples were then amplified by PCR using primers; forward nt 184/203 from exon 3; reversed nt 354/334 from exon 4 of mouse DSPP gene. Expected PCR products were 171 bp from cDNA and 324 bp from genomic DNA, respectively. GAPDH was internal positive control from 6 month-old male (**C**) and female (**D**) mouse cDNAs. PCR products were analyzed by agarose electrophoresis and stained with ethidium bromide. **E.** Value of each tissues was obtained from ratio between DSPP and GAPDH genes. The value from kidney group was taken as a 1.0-fold increase. The relative fold value was calculated by dividing the individual value by the kidney group value. Lane 1, DNA size marker; lane 2, long bone; lane 3, teeth; lane 4, pancreas; lane 5, intestine; lane 6, liver; lane 7, kidney; lane 8, muscle; lane 9, brain; lane 10, tongue; lane 11, mouse genomic DNA from Promega (Cat. # G3091); lane 12, negative control.

# Supplemental Fig. 1

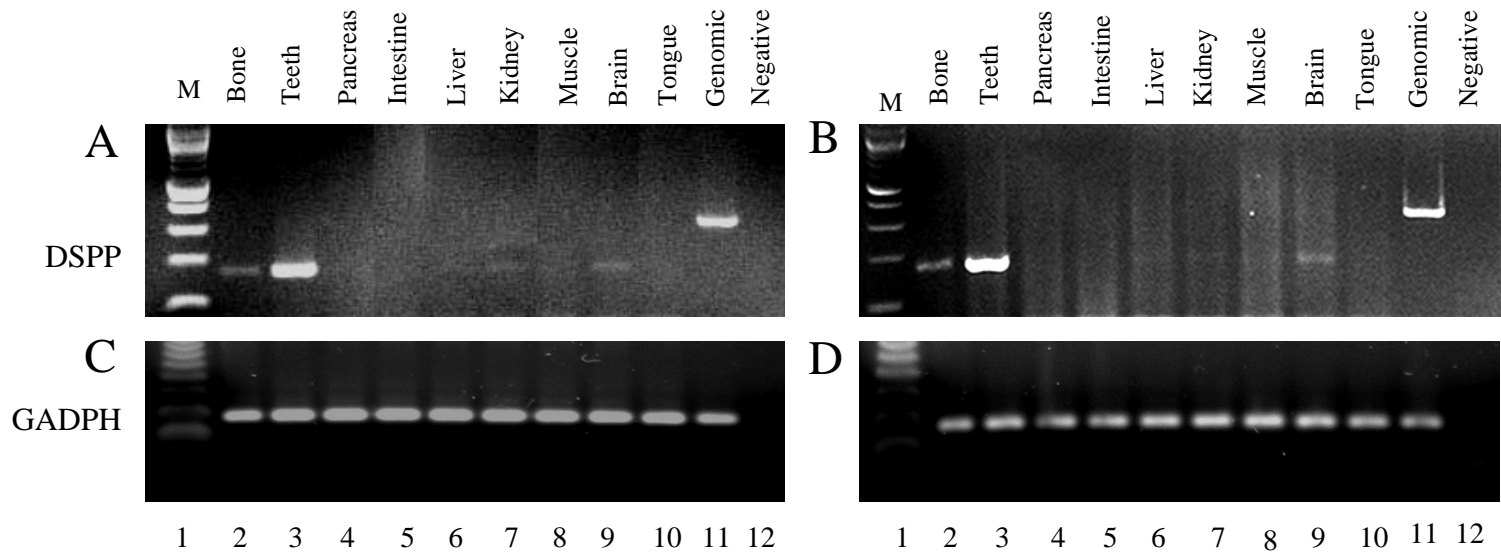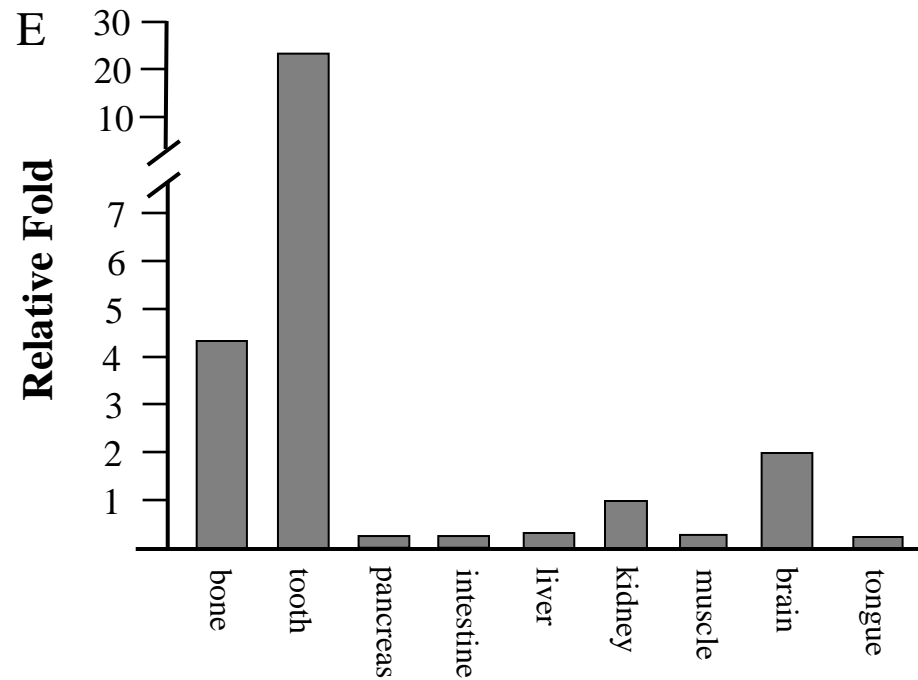

Supplement: NIHMS119251-supplement-01.pdf [file NIHMS119251-supplement-01.pdf]
